# Supplementary material for: Endonuclease G promotes autophagy by suppressing mTOR signaling and activating the DNA damage response
Source: Springer Nature journal article supplement (doi:10.1038/s41467-020-20780-2), 2021-01-20
Supplement: 41467_2020_20780_MOESM1_ESM.pdf [file 41467_2020_20780_MOESM1_ESM.pdf]

1 *Supplementary materials for*

2 **Endonuclease G promotes autophagy by suppressing mTOR**  
 3 **signaling and activating DNA damage response**

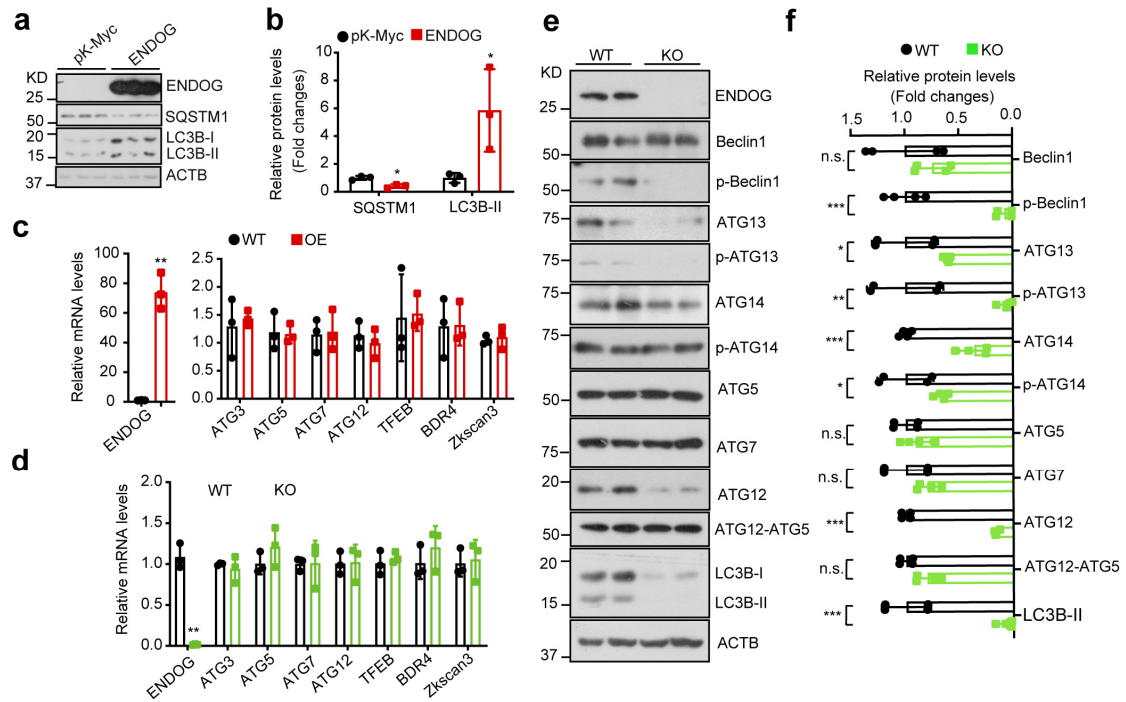

5 **Figure S1. ENDOG promotes autophagy in L02. a-b.** Representative western blots  
 6 and quantitative results of autophagy related proteins (transfected with pK-Myc or  
 7 ENDOG for 48 hours; n = 3 independent samples; data are presented as mean values ±  
 8 SD; \* p < 0.05). **c-d.** qPCR of autophagy related genes in ENDOG knockout (KO) (c)  
 9 or ENDOG overexpressed (OE) (d) L02 cells (n = 3 independent samples; data are  
 10 presented as mean values ± SD; \*\* p < 0.01). **e-f.** Representative western blots and  
 11 quantitative results of autophagy-related proteins in wild-type or ENDOG knockout  
 12 cells. (n = 4 independent samples; data are presented as mean values ± SD; \* p < 0.05;  
 13 \*\* p < 0.01, \*\*\* p < 0.001, n.s. : no significance). Source data are provided as a  
 14 Source Data file.

16

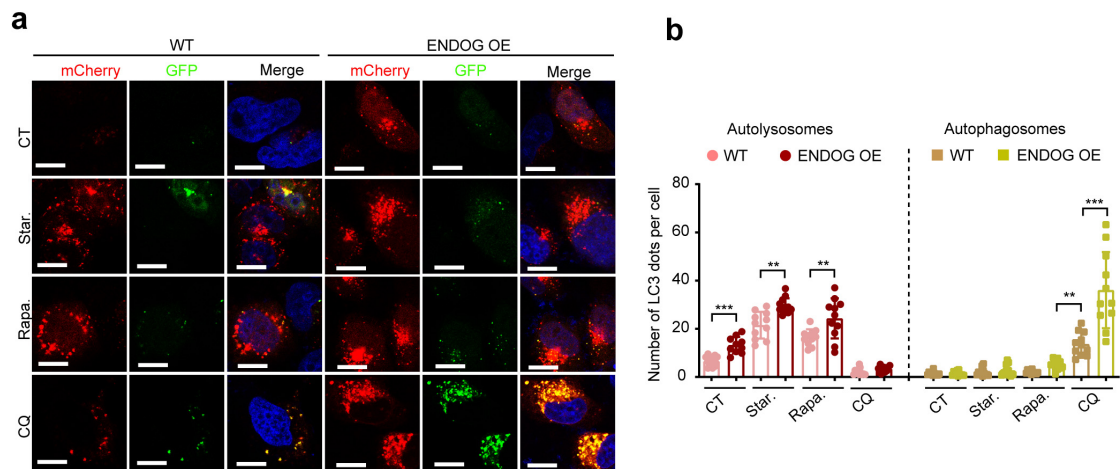

17

18 **Figure S2. ENDOG promotes autophagic flux in L02 cells. a-b.** Representative  
19 images (a) and quantitative results (b) of autophagosome and autolysosome in wild-  
20 type and ENDOG overexpressed L02 cells upon different treatments. (WT: wild-type;  
21 OE: ENDOG overexpressed; CT: control; Star.: starvation for 6 hours; Rapa.:  
22 Rapamycin, 1  $\mu$ M for 6 hours; CQ: 50  $\mu$ M for 6 hours; Scale bar =10  $\mu$ m; n = 100  
23 independent cells examined over 3 independent experiments; data are presented as  
24 mean values  $\pm$  SD, \*\* p < 0.01, \*\*\* p < 0.001). Source data are provided as a Source  
25 Data file.

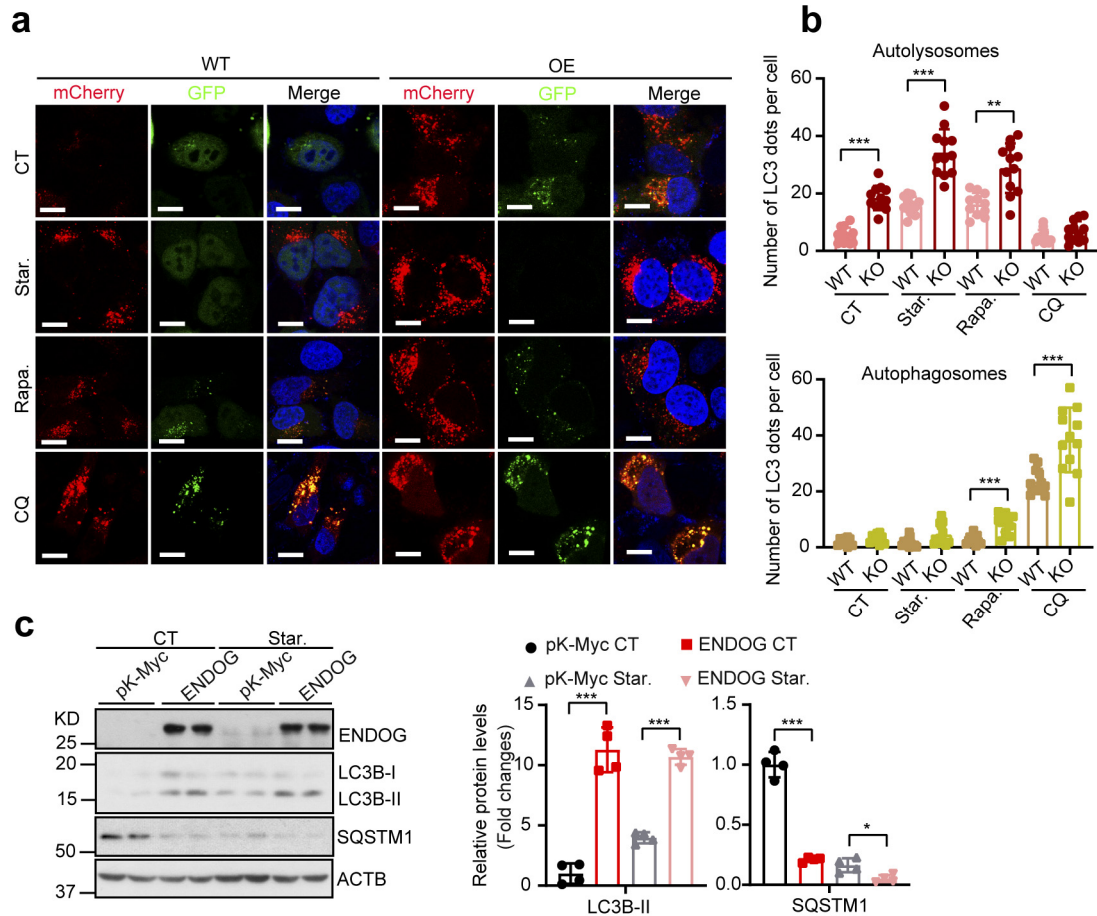

26

27 **Figure S3. ENDOG promotes autophagic flux in HepG2. a-b.** Representative images

28 (a) and quantitative results (b) of autophagosome and autolysosome in wild-type and

29 ENDOG overexpressed HepG2 cells upon different treatments. (WT: wild-type; OE:

30 ENDOG overexpressed; CT: control; Star.: starvation for 6 hours; Rapa.: Rapamycin,

31 1  $\mu$ M for 6 hours; CQ: 50  $\mu$ M for 6 hours; Scale bar =10  $\mu$ m; n= 100 independent cells

32 examined over 3 independent experiments, data are presented as mean values  $\pm$  SD,

33 \*\* p < 0.01, \*\*\* p < 0.001). c. Representative western blots and quantitative results of

34 autophagy related proteins in HepG2 cells under the normal or starvation conditions.

35 (Star.: starvation for 6 hours;n = 4 independent samples; data are presented as mean

36 values  $\pm$  SD, \* p < 0.05; \*\*\* p < 0.001). Source data are provided as a Source Data

37 file.

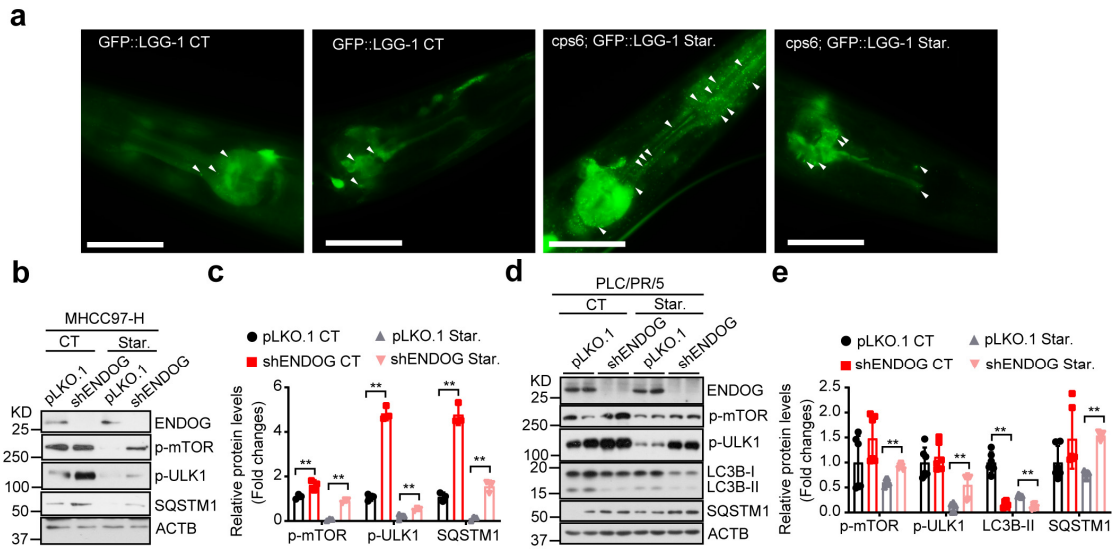

38

39 **Figure S4. Loss of ENDOG represses starvation-induced autophagy.**

40 **a.** Representative images of GFP-LGG-1 puncta in the pharyngeal muscle of control or

41 ENDOG loss (*cps-6*;GFP::LGG-1) *C. elegans*. (white arrows, GFP-LGG-1 puncta,

42 Star.: starvation for 4 hours; Scale bar =50  $\mu$ m; biological repeated three times). **b-e.**

43 Representative western blots and quantitative results of mTOR pathway and autophagy

44 related proteins in MHCC97-H (**b-c**) and PLC/PR/5 cells (**d-e**) following the starvation

45 treatment for 6 hours. (n = 3-4 independent samples; data are presented as mean values

46  $\pm$  SD, \*\* P < 0.01). Source data are provided as a Source Data file.

47

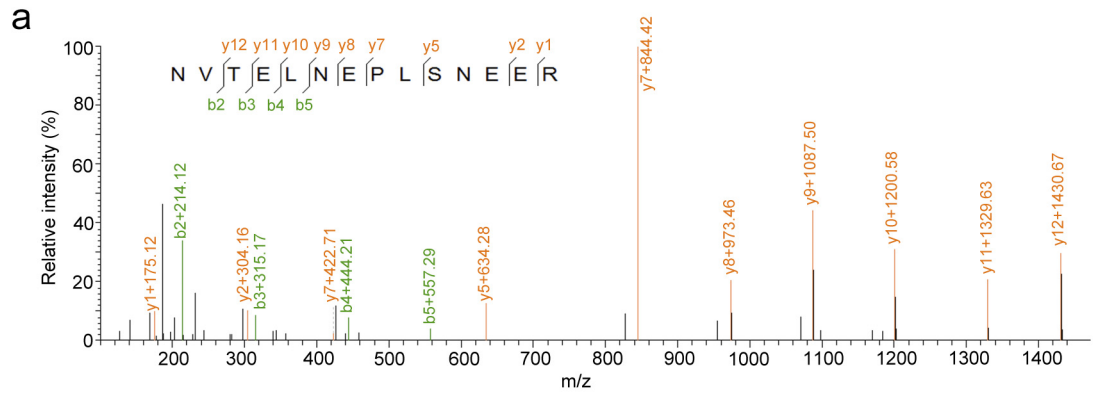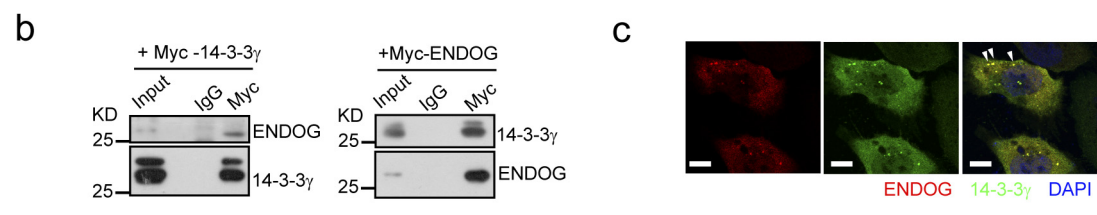

48  
49 **Figure S5. ENDOG interacts with 14-3-3 $\gamma$ .** a. Mass spectrometry (MS) analysis of 14-  
50 3-3 $\gamma$  peptide. b. Co-IP experiments showed that interaction between ENDOG and 14-  
51 3-3 $\gamma$  in Myc-14-3-3 $\gamma$  (left) or Myc-ENDOG (right) overexpressed L02 cell (biological  
52 repeated three times). c. Representative IF staining images showed the co-localization of  
53 14-3-3 $\gamma$  and ENDOG in L02 cell (white arrows). (Scale bar = 10  $\mu$ m; biological repeated  
54 three times). Source data are provided as a Source Data file.

55

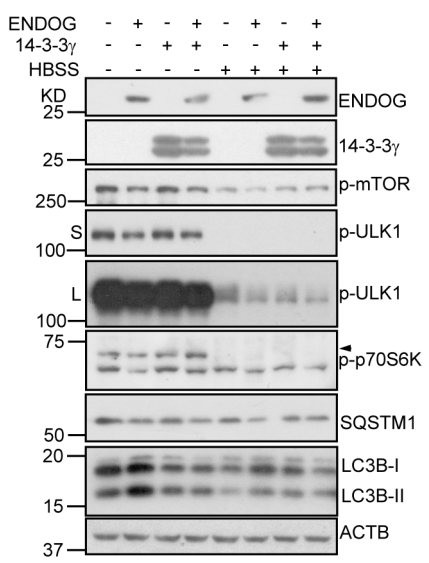

56

57 **Figure S6. 14-3-3 $\gamma$  repressed the ENDOG-induced mTOR repression and**

58 **autophagy.** Western blots of the indicated proteins. (ENDO G or 14-3-3 $\gamma$  were  
 59 transfected for 48 hours; HBSS treated for 6 hours; S: short exposure; L: long exposure;  
 60 biological repeated three times). Source data are provided as a Source Data file.  
 61

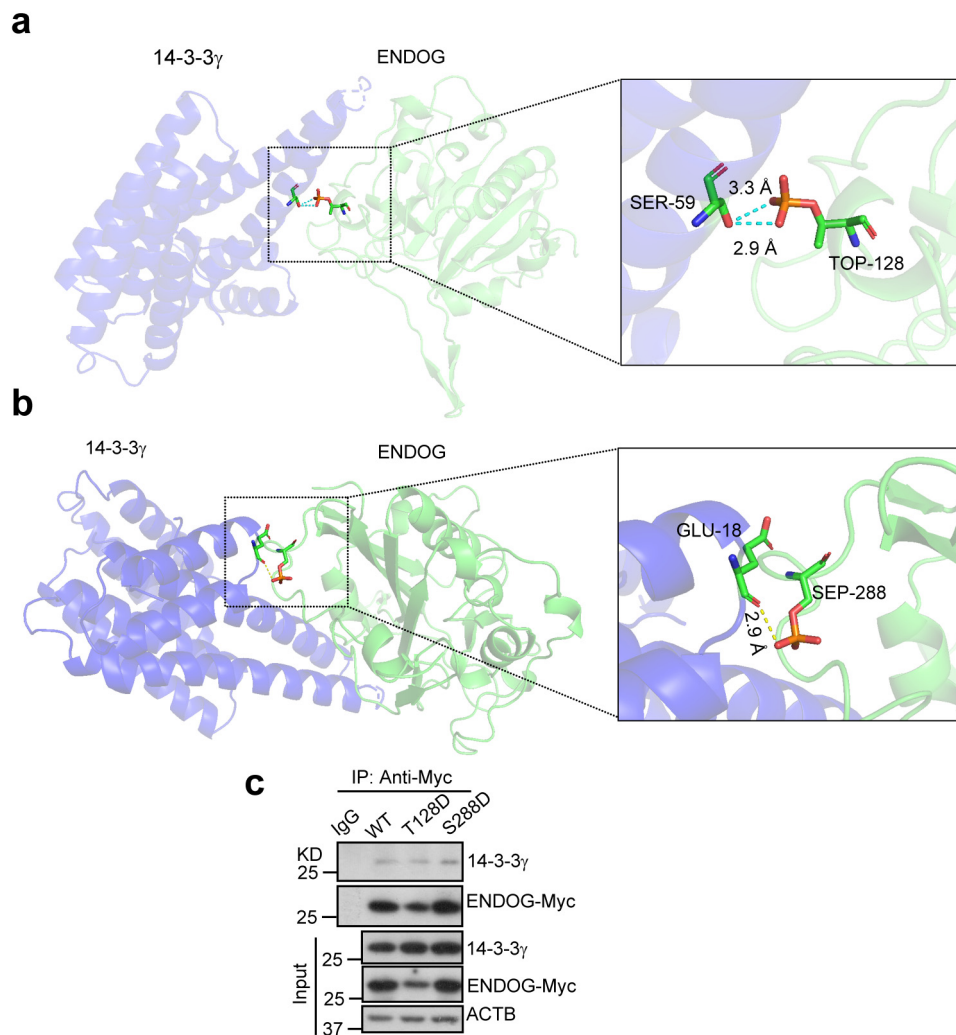

62  
 63 **Figure S7. Interactive docking prediction of 14-3-3 $\gamma$  and ENDOG by Zdock Server**  
 64 **and Co-IP confirmation. a.** The phosphorylated Threonine-128 of ENDOG have two  
 65 hydrogen bonds with Serine-59 of 14-3-3 $\gamma$ . **b.** The phosphorylated Serine-288 of  
 66 ENDOG have one hydrogen bonds with Glutamic Acid-18 of 14-3-3 $\gamma$ . **c.** Wild-type or  
 67 indicated mutant ENDOG were overexpressed in the ENDOG knockout cells for 48  
 68 hours. Co-IP experiments were performed by Anti-myc. (WT: wild-type; T128D: T128

69 to D128 mutation of ENDOG; S288D:S288 to D288 mutation of ENDOG; biological  
 70 repeated three times). Source data are provided as a Source Data file.

71

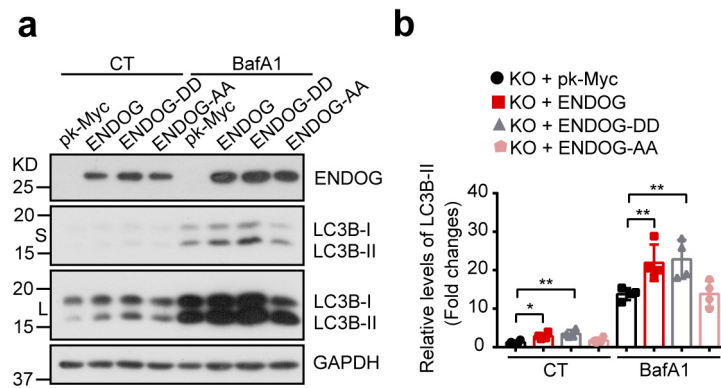

72

73 **Figure S8. Phosphorylation of T128 and S288 is necessary for ENDOG-mediated**

74 **autophagy. a-b.** Western blots of the indicated proteins (a) and the quantification of

75 LCEB-II (b). (ENDOG KO cells transfected with pK-Myc, wild type ENDOG,

76 ENDOG-DD and ENDOG-AA for 48 hours; BafA1: 100 nM, for 6 hours; S: short

77 exposure; L: long exposure; n = 4 independent samples; data are presented as mean

78 values  $\pm$  SD, \*  $p < 0.05$ ; \*\*  $p < 0.01$ ). Source data are provided as a Source Data file.

79

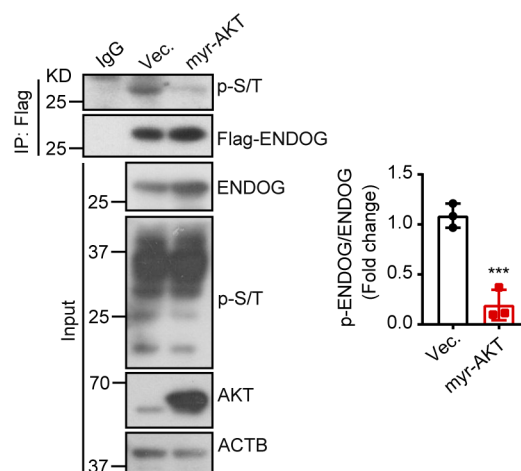

80

81 **Figure S9. AKT represses the phosphorylation of ENDOG.** Overexpression of



82 activated AKT represses the phosphorylation of ENDOG in ENDOG overexpressed  
 83 L02, quantitative results on right. (Vec.: empty vector; myr-AKT: constitutively  
 84 activated AKT; co-overexpressed Flag-ENDOG and myr-AKT/Vec for 48 hours; n = 3  
 85 independent experiments; data are presented as mean values  $\pm$  SD; \*\*\* p < 0.001).  
 86 Source data are provided as a Source Data file.  
 87

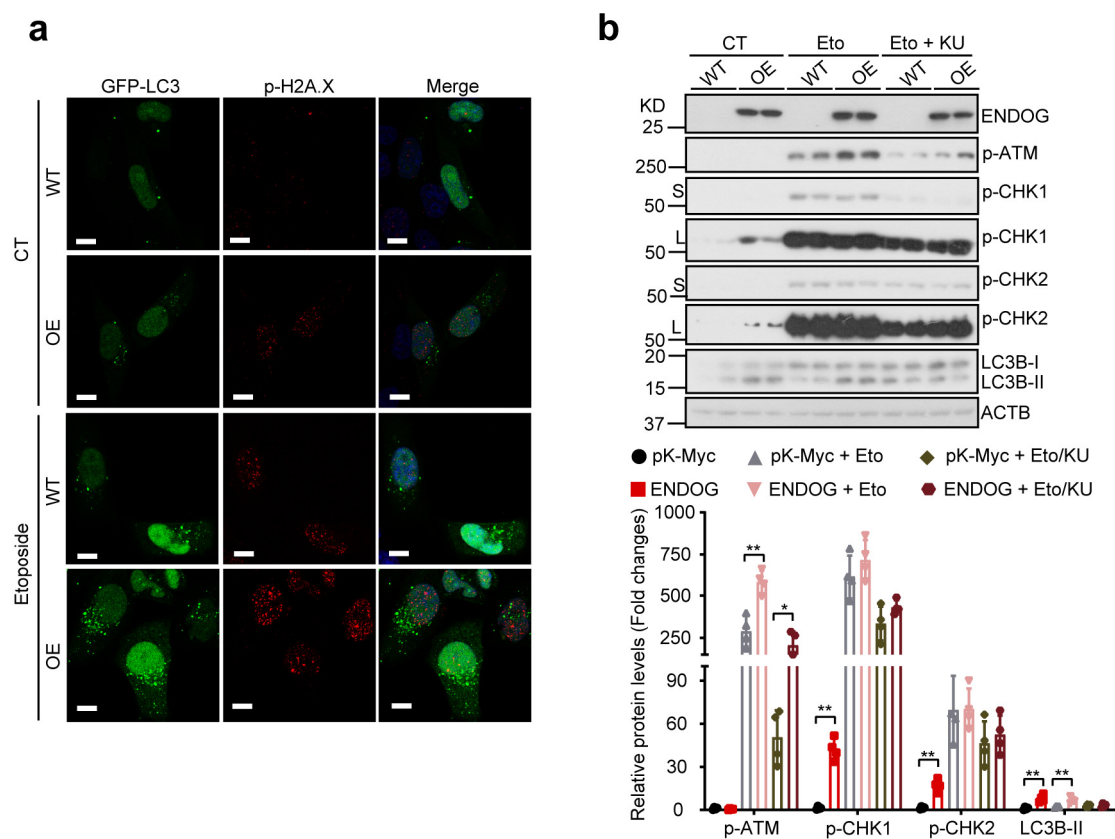

88  
 89 **Figure S10. ENDOG promotes autophagy through activating the DNA damage**  
 90 **response. a.** Representative images of p-H2A.X foci and autophagosome (GFP-LC3  
 91 puncta) in wild-type and ENDOG overexpressed cells following the etoposide  
 92 treatment (Etoposide: 50  $\mu$ M for 1 hour; Scale bar =10  $\mu$ m). **b.** Representative western  
 93 blots (upper) and quantitative results (lower) of p-ATM, p-CHK1, p-CHK2, LC3B and  
 94 ENDOG in wild-type and ENDOG overexpressed cells following the indicated



95 treatments (WT: wild-type; OE: ENDOG overexpressed; Eto: Etoposide, 50  $\mu$ M for 1  
 96 hour; KU: KU-60019, 10  $\mu$ M for 1 hour; L: long exposure; S: short exposure; n = 4  
 97 independent samples; data are presented as mean values  $\pm$  SD\* p < 0.05; \*\* p < 0.01).  
 98 Source data are provided as a Source Data file.

99

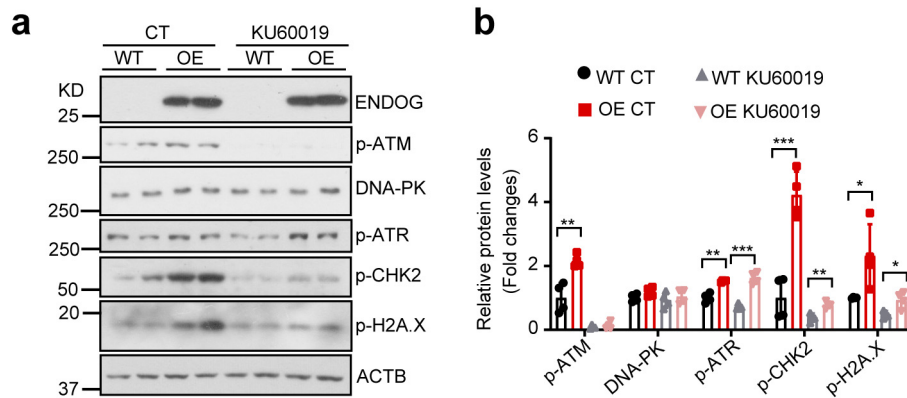

100

101 **Figure S11. KU60019 treatment partially repressed the ENDOG-induced DNA**  
 102 **damage. a-b.** Western blots (a) and quantification (b) of the indicated proteins in wild-  
 103 type and ENDOG overexpressed cells following the KU60019 treatment. (KU60019:  
 104 10  $\mu$ M for 1 hour; n = 4 independent samples; \* p < 0.05; \*\* p < 0.01; \*\*\* p < 0.001).  
 105 Source data are provided as a Source Data file.

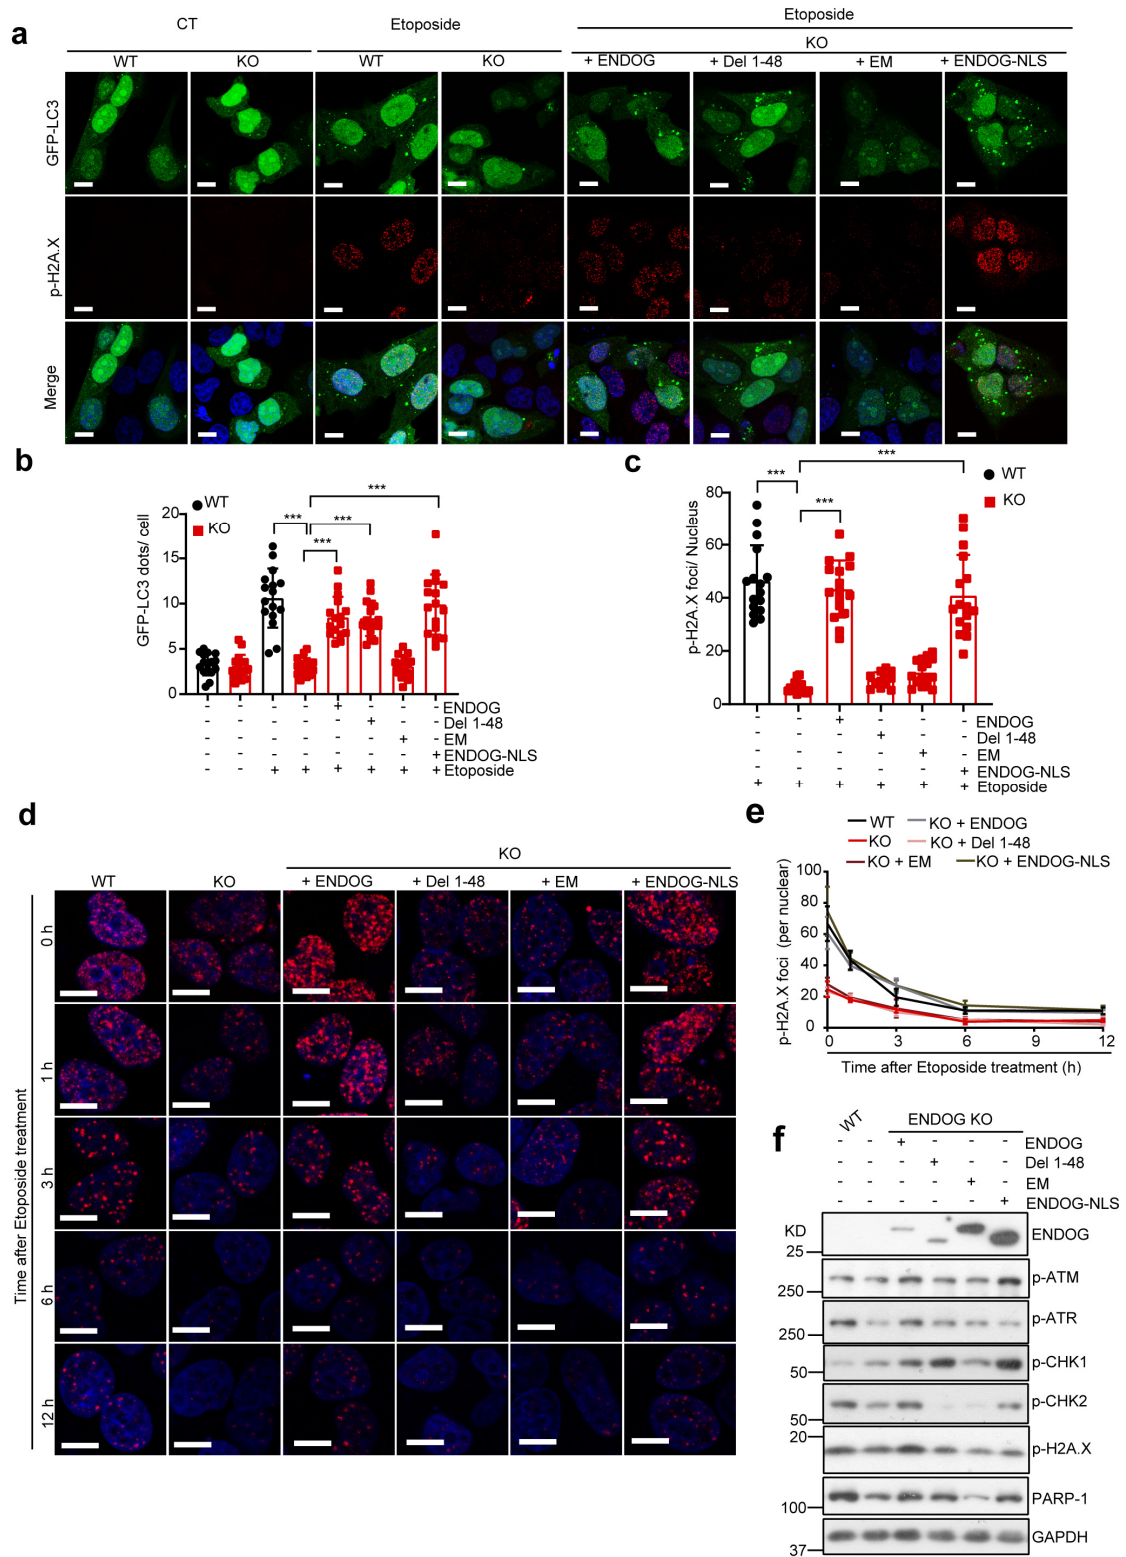

106

107 **Figure S12. Endonuclease activity of ENDOG is essential for the DNA damage**

108 **response and autophagy induction. a-c.** Representative images (a) and respective

109 quantitative results (b) of GFP-LC3 puncta and p-H2A.X foci under etoposide

110 treatment (c). (WT: wild-type; KO: ENDOG knockout; plasmids transiently transfected  
 111 for 48 hours; etoposide: 50  $\mu$ M for 1 hour; Scale bar = 10  $\mu$ m; n = 100 independent  
 112 cells examined over 3 independent experiments, data are presented as mean values  $\pm$   
 113 SD, \*\*\* p < 0.001). **d-e.** Representative images of p-H2A.X foci (**d**) and quantitative  
 114 results (**e**) in the indicated cell groups at different time points after etoposide treatment  
 115 (Scale bar = 10  $\mu$ m; n = 50 independent cells). **f.** Western blots of the indicated proteins  
 116 in wild-type, ENDOG KO cells, and ENDOG KO cells transfected with the ENDOG  
 117 mutants. Source data are provided as a Source Data file.  
 118

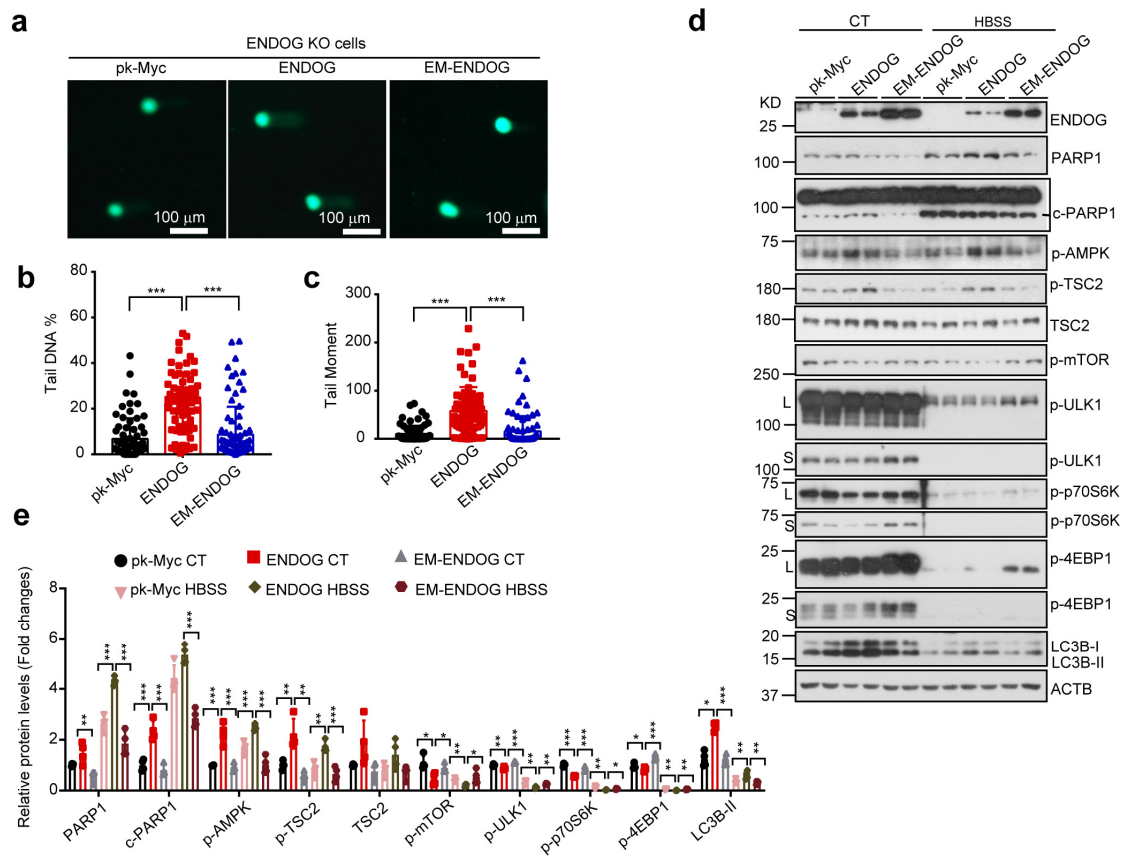

119  
 120 **Figure S13. Endonuclease activity of ENDOG is essential for ENDOG-mediated**  
 121 **DNA damage and mTOR repression under the starvation.** **a-c.** Representative  
 122 images of comet assay (**a**) and the quantification of tail DNA (**b**) and tail moment (**c**).

123 (ENDO G knockout cells were transfected with pK-Myc, wild-type and EM-ENDOG  
 124 for 48 hours; n = 75- 150 independent cells; data are presented as mean values  $\pm$  SD;  
 125 \*\*\* p < 0.0001). **d-e.** Western blots (**d**) and quantification (**e**) of the indicated proteins.  
 126 (ENDO G knockout cells were transfected with pK-Myc, wild-type and EM-ENDOG  
 127 for 48 hours and treated with HBSS for 6 hours; n = 4 independent samples; S: short  
 128 exposure; L: long exposure; data are presented as mean values  $\pm$  SD; \* p < 0.05; \*\* p  
 129 < 0.01; \*\*\* p < 0.001). Source data are provided as a Source Data file.

130

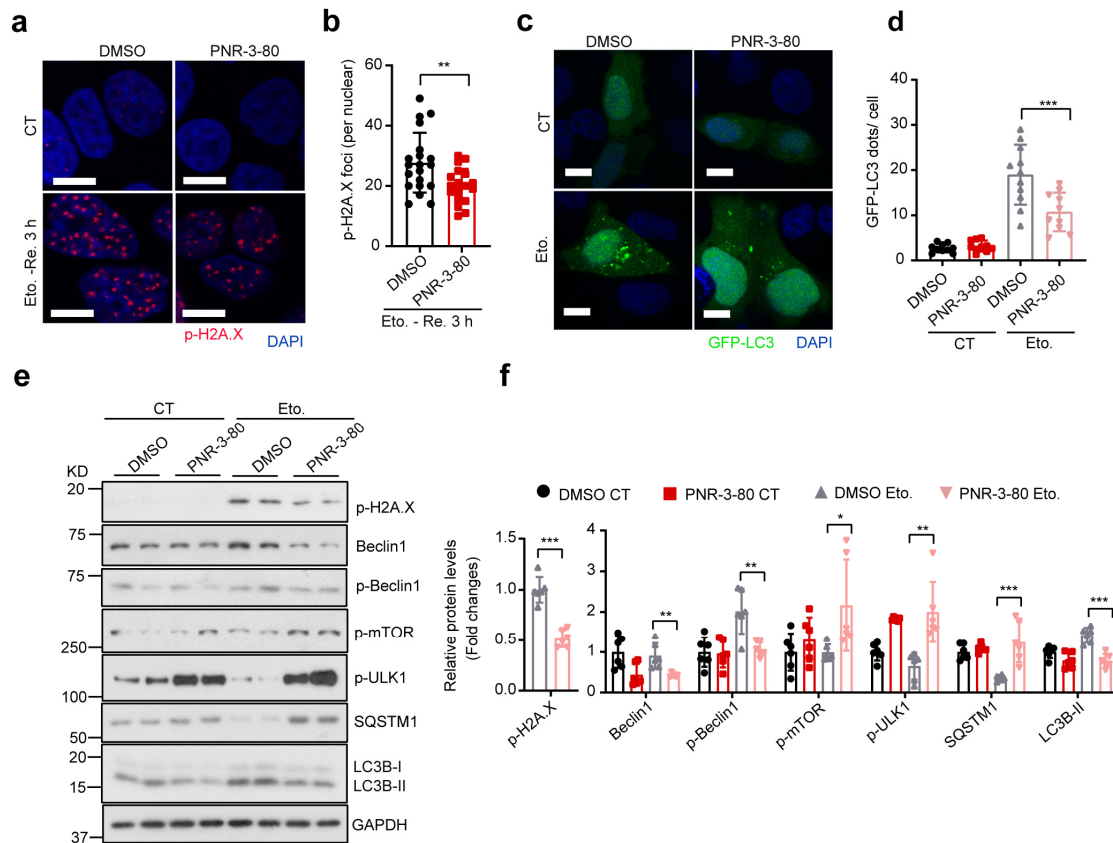

131

132 **Figure S14. Inhibition of ENDOG activity represses DNA damage-induced**  
 133 **autophagy. a-b.** Representative images (**a**) and respective quantitative results (**b**) of p-  
 134 H2A.X foci in L02 cells (Scale bar = 10  $\mu$ m; n = 100 independent cells examined over  
 135 3 independent experiments; data are presented as mean values  $\pm$  SD; \*\* p < 0.01).

136 Representative images (**c**) and respective quantitative results (**d**) of GFP-LC3 puncta in  
137 L02 cells (Scale bar = 10  $\mu\text{m}$ ; n = 100 independent cells examined over 3 independent  
138 experiments; data are presented as mean values  $\pm$  SD; \*\*\* p < 0.001). **e-f**. Western blots  
139 (**e**) and quantification (**f**) of the indicated proteins (n = 4 independent samples). (PNR-  
140 3-80: ENDOG inhibitor, 50  $\mu\text{M}$  for 24 hours; Eto.: etoposide, 50  $\mu\text{M}$  for 1 hour; data  
141 are presented as mean values  $\pm$  SD; \* p < 0.05; \*\* p < 0.01; \*\*\* p < 0.001). Source data  
142 are provided as a Source Data file.

143

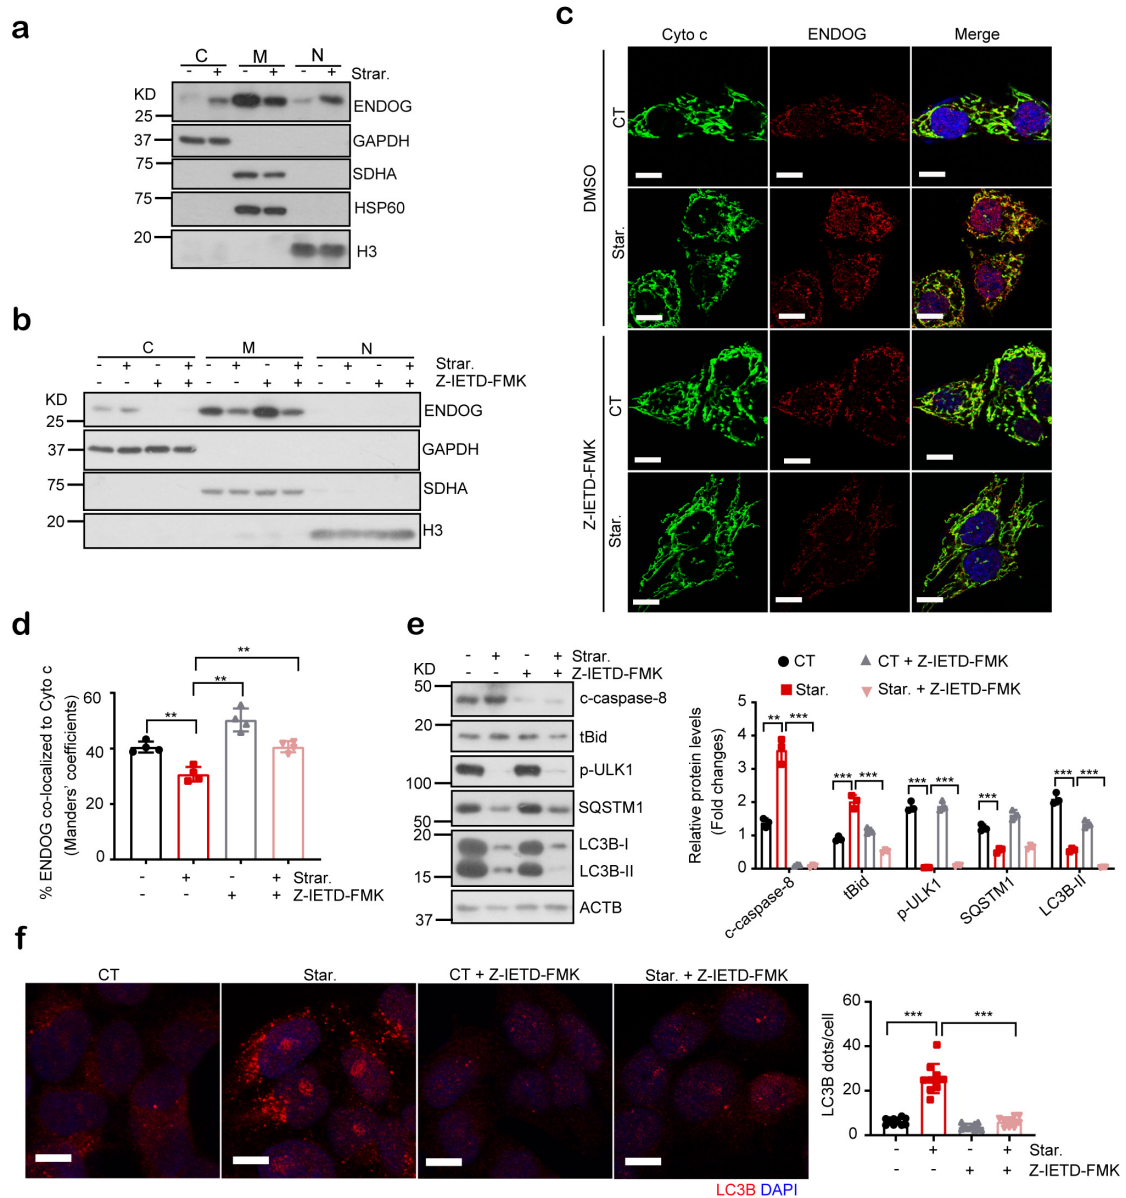

144

145 **Figure S15. Caspase-8/tBid mediate starvation induced autophagy and the release**

146 **of ENDOG from mitochondria.** **a.** Sub-cellular fractionation isolation shows

147 starvation promotes the release of ENDOG from mitochondria to cytosol and nuclei in

148 L02 cells (Star.: Starvation for 6 hours; C: cytoplasm; M: mitochondria; N: nuclear

149 biological repeated three times). **b.** Inhibition of caspase-8 represses the release of

150 ENDOG from mitochondria in L02 cells (Star.: Starvation for 6 hours; Z-IETD-FMK:

151 caspase-8 inhibitor, 50  $\mu$ M for 2 hours; C: cytoplasm; M: mitochondria; N: nuclear;

152 biological repeated three times). **c.** Representative immunofluorescent staining images

153 of Cytochrome c (mitochondria marker) and ENDOG under caspase-8 inhibitor and  
154 starvation treatment (Star.: starvation for 6 hours, Z-IETD-FMK: 10  $\mu$ M for 2 hours;  
155 Scale bar =10  $\mu$ m; biological repeated three times). **d.** Quantitative analysis for  
156 thecolocalization of ENDOG with mitochondria (Cyto c) in (c) by ImageJ plugin  
157 JACOP (n = 4 independent field; data are presented as mean values  $\pm$  SD, \*\* p < 0.01).  
158 **e.** Western blots (left) and quantitative results (right) showed inhibition of caspase-8  
159 represses starvation-induced autophagy (n = 3 independent experiments; data are  
160 presented as mean values  $\pm$  SD). **f.** Immunofluorescent staining of endogenous LC3B  
161 (Star. : starvation for 6 hours, Z-IETD-FMK: 10  $\mu$ M for 2 hours; Scale bar = 10  $\mu$ m;  
162 100 independent cells examined over 3 independent experiments; data are presented  
163 as mean values  $\pm$  SD; \*\*\* p < 0.001). Source data are provided as a Source Data file.

164

165

166

167

168

169

170

171

172

173

174



175 **Table S1. Candidate 14-3-3-binding sites of ENDOG**

| Position | Peptide       | ANN   | PSSM   | SVM    | Consensus |
|----------|---------------|-------|--------|--------|-----------|
| 12       | AGLTLA[S]GAGL | 0.118 | -0.242 | -1.087 | -0.404    |
| 77       | GLAQLK[S]RESY | 0.296 | 0.020  | -0.532 | -0.072    |
| 80       | QLKSRE[S]YVLC | 0.236 | 0.018  | -0.860 | -0.202    |
| 89       | LCYDPR[T]RGAL | 0.178 | -0.014 | -0.886 | -0.241    |
| 120      | DFREDD[S]VHAY | 0.500 | 0.229  | -0.434 | 0.098     |
| 128      | HAYHRA[T]NADY | 0.380 | 0.138  | -0.545 | -0.009    |
| 135      | NADYRG[S]GFDR | 0.291 | 0.023  | -0.511 | -0.066    |
| 151      | AANHRW[S]QKAM | 0.243 | -0.065 | -0.857 | -0.226    |
| 158      | QKAMDD[T]FYLS | 0.269 | -0.069 | -0.606 | -0.135    |
| 162      | DDTFYL[S]NVAP | 0.091 | -0.174 | -1.274 | -0.452    |
| 183      | NNLEKY[S]RSLT | 0.039 | -0.304 | -1.443 | -0.569    |
| 185      | LEKYSR[S]LTRS | 0.499 | 0.191  | -0.233 | 0.152     |
| 187      | KYSRSL[T]RSYQ | 0.461 | 0.766  | -0.114 | 0.371     |
| 189      | SRSLTR[S]YQNV | 0.076 | 0.117  | -1.615 | -0.474    |
| 197      | QNVYVC[T]GPLF | 0.394 | 0.342  | -0.252 | 0.161     |
| 205      | PLFLPR[T]EADG | 0.321 | 0.091  | -0.592 | -0.060    |
| 211      | TEADGK[S]YVKY | 0.105 | -0.129 | -1.133 | -0.386    |
| 227      | NHVAVP[T]HFFK | 0.128 | -0.251 | -1.327 | -0.482    |
| 246      | GQIELR[T]YVMP | 0.031 | -0.252 | -1.869 | -0.697    |

|     |               |       |        |        |        |
|-----|---------------|-------|--------|--------|--------|
| 269 | FLVPIE[S]IERA | 0.157 | -0.115 | -0.892 | -0.283 |
| 274 | ESIERA[S]GLLF | 0.097 | -0.015 | -1.104 | -0.341 |
| 288 | ILARAG[S]LKAI | 0.916 | 1.139  | 1.564  | 1.206  |
| 293 | GSLKAI[T]AGSK | 0.491 | 0.067  | -0.353 | 0.068  |
| 296 | KAITAG[S]K    | 0.160 | 0.021  | -1.083 | -0.301 |

176 (Data analysis from <http://www.compbio.dundee.ac.uk/1433pred>)

177 ANN - Artificial Neural Network (cut-off = 0.55)

178 PSSM - Position-Specific Scoring Matrix (cut-off = 0.80)

179 SVM - Support Vector Machine (cut-off = 0.25)

180 Consensus - Average of the scores provided by the three methods (cut-off = 0.50)

181

182 **Table S2. Primary antibodies used in the present study.**

| Antibody            | Company (catalognumber)           | Application |
|---------------------|-----------------------------------|-------------|
| Primary antibodies  |                                   |             |
| ACTB                | Sigma (A8481)                     | WB, 1:10000 |
| ATG5                | Cell Signaling Technology (12994) | WB, 1:5000  |
| ATG7                | Sigma (A2857)                     | WB, 1:5000  |
| ENDO G              | Cell Signaling Technology (4969)  | WB, 1:1000  |
| ENDO G              | NOVUS (IMG-5565-2)                | IF, 1:100   |
| Flag-tag            | Sigma (F1804)                     | IP, 1:1000  |
| GFP                 | Sigma (11814460001)               | WB, 1:10000 |
| LC3B                | Sigma (L7543)                     | WB, 1:5000  |
| Myc-tag             | Proteintech (16286-1-AP)          | IP, 1:1000  |
| p-4EBP1 (Thr 37/46) | Cell Signaling Technology (2855)  | WB, 1:1000  |
| p-mTOR (Ser 2448)   | Cell Signaling Technology (5536)  | WB, 1:2000  |

|                    |                                   |               |
|--------------------|-----------------------------------|---------------|
| mTOR               | Cell Signaling Technology (2983)  | WB,1:2000     |
| p-p70S6K (Thr 389) | Cell Signaling Technology (9234)  | WB, 1:1000    |
| p-ULK1 (Ser 757)   | Cell Signaling Technology (14202) | WB, 1:1000    |
| SQSTM1             | Sigma (P0067)                     | WB, 1:10000   |
| Phospho-Ser/Thr    | Cell Signaling Technology (25081) | WB, 1:1000    |
| 14-3-3 $\gamma$    | Proteintech (12381-1-AP)          | WB/IP, 1:1000 |
| p-H2A.X (Ser139)   | Cell Signaling Technology (9718)  | WB, 1:1000    |
| p-ATM (Ser1981)    | Cell Signaling Technology (5883)  | WB, 1:1000    |
| p-p53 (Ser15)      | Cell Signaling Technology (9286)  | WB, 1:1000    |
| p-CHK1             | Cell Signaling Technology (2348)  | WB, 1:2000    |
| p-CHK2             | Cell Signaling Technology (2197)  | WB, 1:2000    |
| TSC2               | Proteintech (20004-1-AP)          | WB, 1:1000    |
| Vps34              | Proteintech (12452-1-AP)          | WB, 1:2000    |
| GSK-3 $\beta$      | Proteintech(22104-1-AP)           | WB, 1:5000    |
| Phospho-Ser/Thr    | Cell Signaling Technology (25081) | WB, 1:1000    |
| Beclin1            | Cell Signaling Technology (3495)  | WB, 1:1000    |
| p-Beclin1 (Ser 93) | Cell Signaling Technology (14717) | WB, 1:1000    |
| ATG13              | Cell Signaling Technology (13273) | WB, 1:5000    |
| p-ATG13 (Ser 355)  | Cell Signaling Technology (26839) | WB, 1:1000    |
| ATG14              | Cell Signaling Technology (96752) | WB, 1:5000    |
| p-ATG14 (Ser 29)   | Cell Signaling Technology (92340) | WB, 1:1000    |
| ATG12              | Cell Signaling Technology (4180)  | WB, 1:5000    |
| p-TSC2 (Ser 1387)  | Cell Signaling Technology (5584)  | WB, 1:1000    |
| PARP-1             | Cell Signaling Technology (9532)  | WB, 1:100     |
| p-AMPK (Thr 172)   | Cell Signaling Technology (50081) | WB, 1:1000    |
| DNA-PK             | Proteintech (19983-1-AP)          | WB, 1:1000    |
| p-ATR (Ser 428)    | Cell Signaling Technology (2853)  | WB, 1:1000    |
| SDHA               | Proteintech (14865-1-AP)          | WB, 1:5000    |
| Hsp60              | Proteintech (15282-1-AP)          | WB, 1:5000    |

|                                                            |                                         |                       |
|------------------------------------------------------------|-----------------------------------------|-----------------------|
| H3                                                         | Cell Signaling Technology (9715)        | WB, 1:5000            |
| Caspase-8                                                  | Cell Signaling Technology (9746)        | WB, 1:10000           |
| Bid                                                        | Cell Signaling Technology (20023)       | WB, 1:1000            |
| Cytochrome c                                               | Santa cruz biotechnology (13561)        | WB, 1:1000            |
| Secondary antibodies                                       |                                         |                       |
| Peroxidase AffiniPure<br>Goat Anti-Rabbit IgG              | Jackson ImmunoResearch<br>(111-035-144) | WB,<br>1:5000-1:10000 |
| Peroxidase AffiniPure<br>Goat Anti-Mouse IgG               | Jackson ImmunoResearch<br>(115-035-146) | WB,<br>1:5000-1:10000 |
| Alexa Fluor® 594-<br>AffiniPure goat anti-<br>rabbit       | Jackson ImmunoResearch<br>(115-585-146) | IF, 1:200-400         |
| Alexa Fluor® 488-<br>AffiniPure goat anti-<br>mouse IgG    | Jackson ImmunoResearch<br>(115-545-146) | IF, 1:200-400         |
| Mouse Anti-Rabbit<br>IgG (Light-Chain<br>Specific) (D4W3E) | Cell Signaling Technology (93702)       | IP, 1:1000            |
| VeriBlot for IP<br>Detection Reagent<br>(HRP)              | Abcam (ab131366)                        | IP, 1:1000            |

183

184

185

186

187 **Table S3. Sequences of primers used in the present study**

| Gene names         | Sequences, 5' to 3'  |
|--------------------|----------------------|
| Human- <i>ATG3</i> | TTCAGTTCACCCATGCAGGC |

|                       |                         |
|-----------------------|-------------------------|
|                       | GTTAACAGCCATTTTGCCACTAA |
| Human- <i>ATG5</i>    | GGGTCCCTCTTGGGGTACAT    |
|                       | ACCACACATCTCGAAGCACA    |
| Human- <i>ATG7</i>    | GAGCAGCCTTGTGAGAGACA    |
|                       | GGATGCACTGGATAACCAGCA   |
| Human- <i>ATG12</i>   | CGAACACGAACCATCCAAGG    |
|                       | TGGTCTGGGGAAGGAGCAAA    |
| Human- <i>TFEB</i>    | TTCCAACAAGGGAAGGTGACAT  |
|                       | TGGCTCCCAGCCTGAGC       |
| Human- <i>BDR4</i>    | GTTGATGTGATTGCCGGCTC    |
|                       | GTGCAGAAAGCTGTTTCGGA    |
| Human- <i>Zkscan3</i> | GGTAGAGGGCCGTTACCGAG    |
|                       | TATGTGACCCATGCATCCCG    |
| Human- <i>ENDOG</i>   | GGTCAAGCTGCGGCTATATT    |
|                       | CGACACGTTCTACCTGAGCA    |
| Human- <i>ACTB</i>    | GTTGTCGACGACGAGCG       |
|                       | GCACAGAGCCTCGCCTT       |

188

189
